# Supplementary material for: Prognostic value of long non-coding RNA UCA1 in human solid tumors
Source: PubMed Central journal article supplement (PMC5295406; doi:10.18632/oncotarget.11155), 2016-08-09
Supplement: oncotarget-07-57991-s001.pdf [file oncotarget-07-57991-s001.pdf]

# Prognostic value of long non-coding RNA UCA1 in human solid tumors

## Supplementary Materials

(1) Association between lncRNA-UCA1 expression and OS:

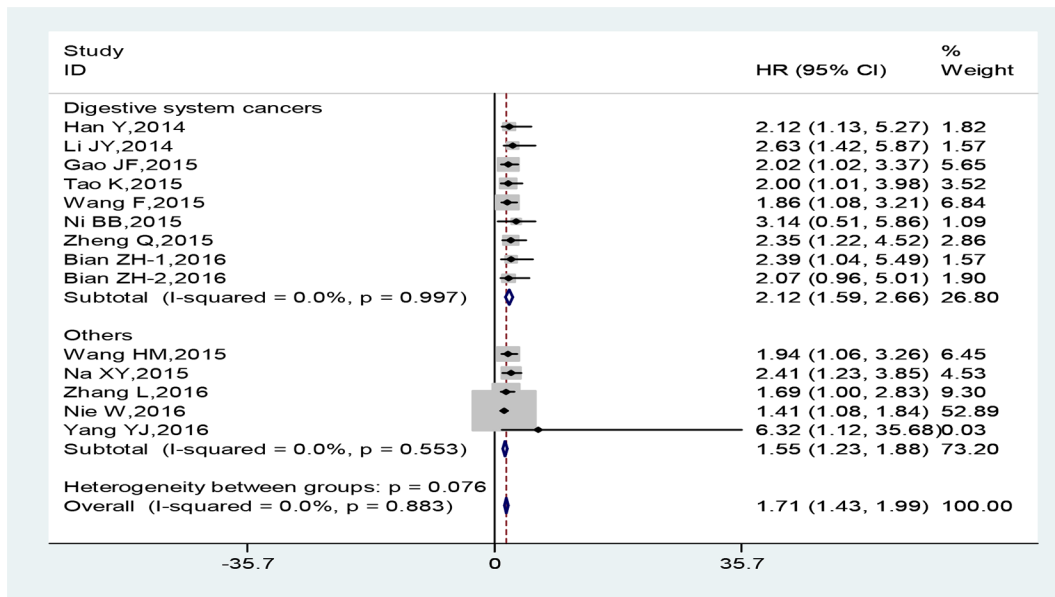

Supplementary Figure S1: Meta-analysis for the pooled HRs of OS stratified by the cancer type.

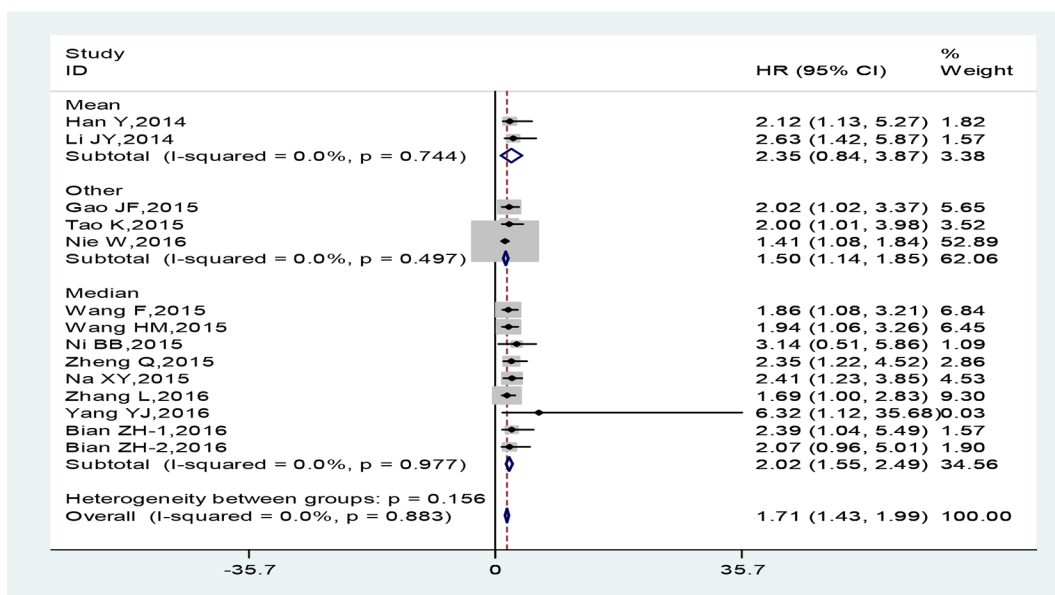

Supplementary Figure S2: Meta-analysis for the pooled HRs of OS stratified by the cutoff value.

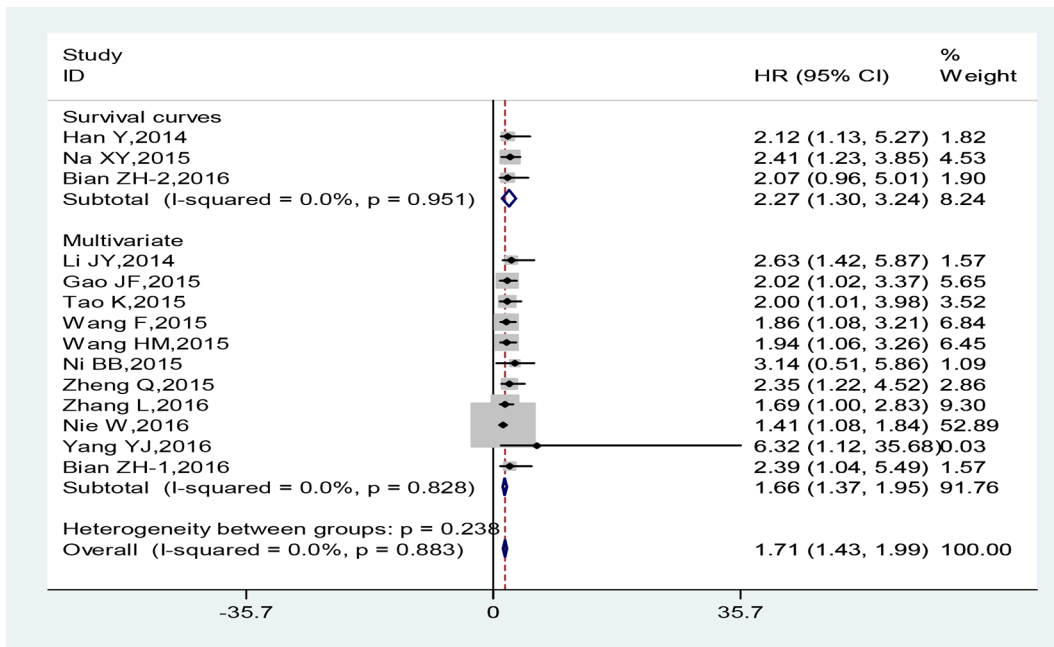

Supplementary Figure S3: Meta-analysis for the pooled HRs of OS stratified by the analysis type.

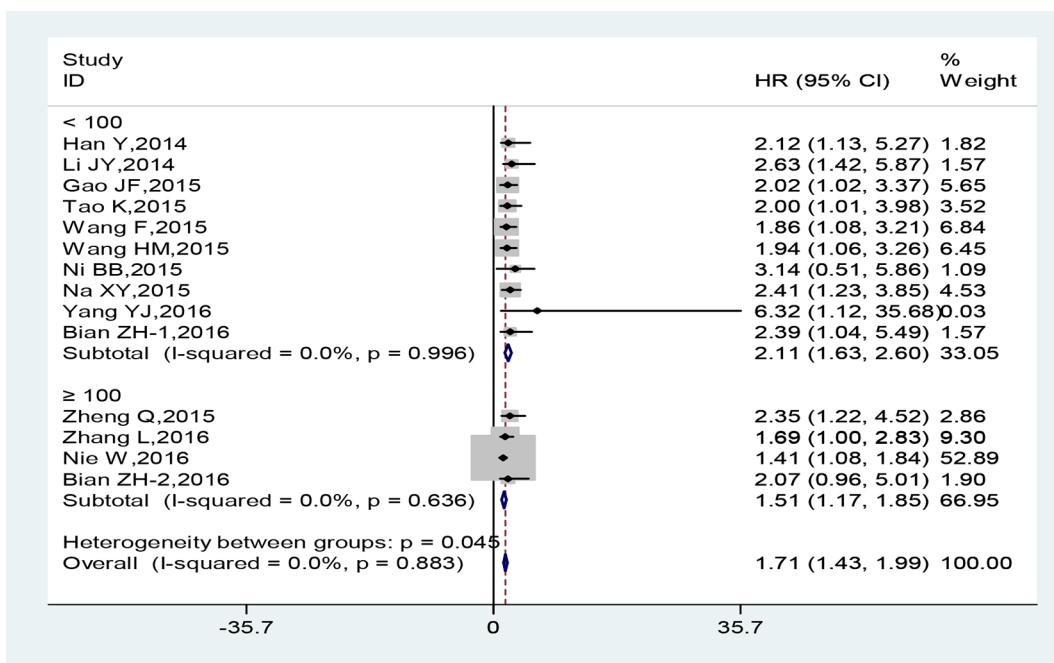

Supplementary Figure S4: Meta-analysis for the pooled HRs of OS stratified by the sample size.

(2) Association between lncRNA-UCA1 expression and clinicopathological parameters:

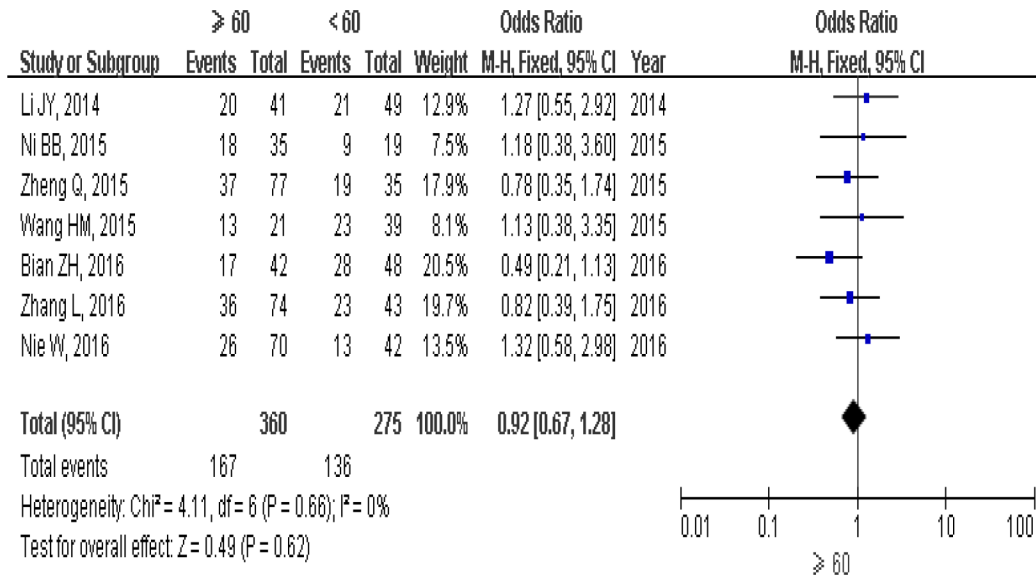

Supplementary Figure S5: The correlation between lncRNA-UCA1 expression and age.

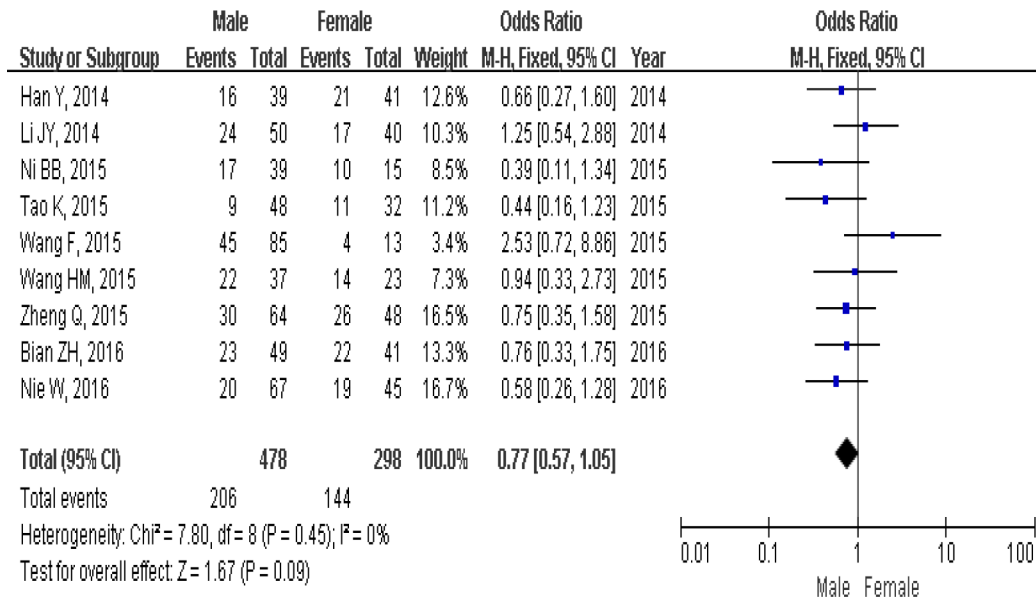

Supplementary Figure S6: The correlation between lncRNA-UCA1 expression and gender (male vs. female).

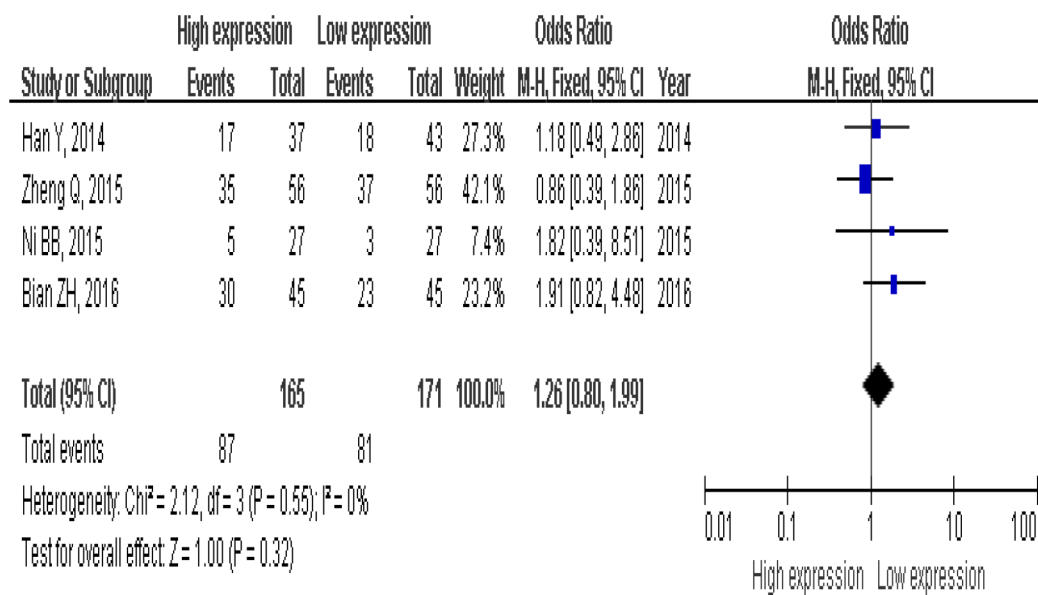

**Supplementary Figure S7: The correlation between lncRNA-UCA1 expression and lymphatic invasion (present vs. absent).**

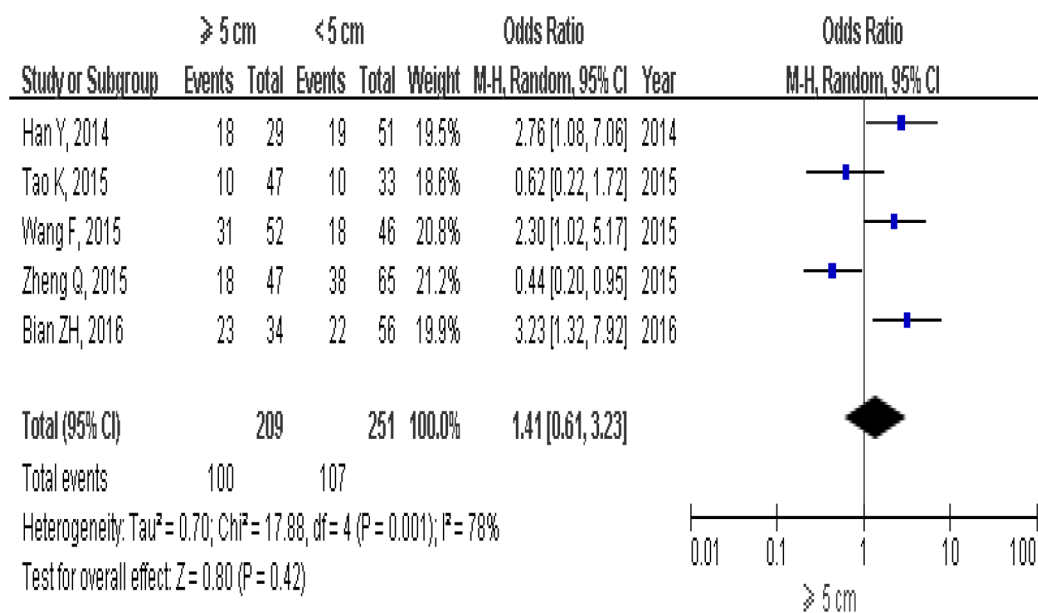

**Supplementary Figure S8: The correlation between lncRNA-UCA1 expression and tumour size.**

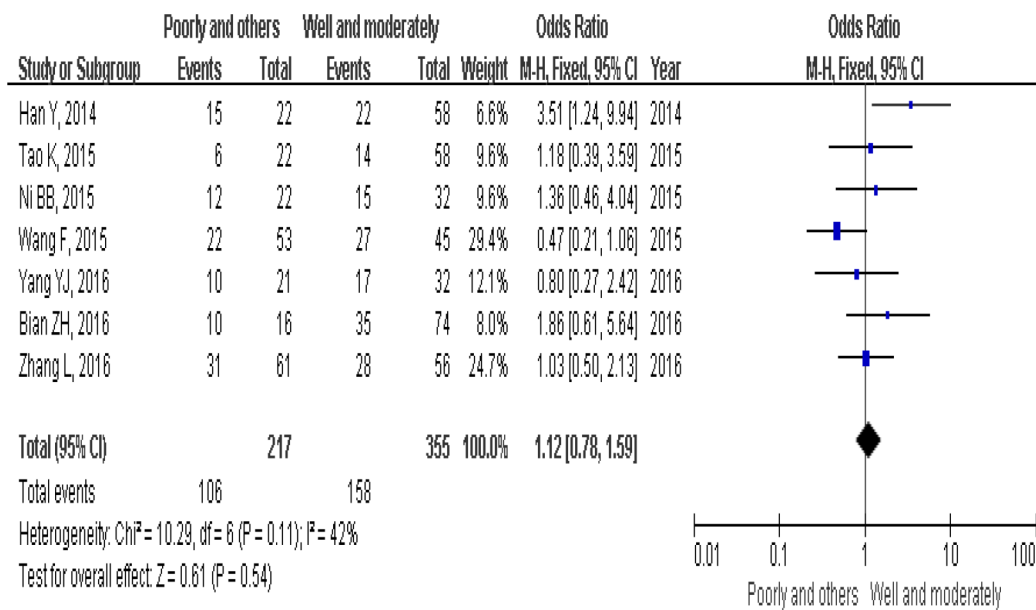

**Supplementary Figure S9: The correlation between lncRNA-UCA1 expression and tumor differentiation (poorly/ others vs. well/moderately).**

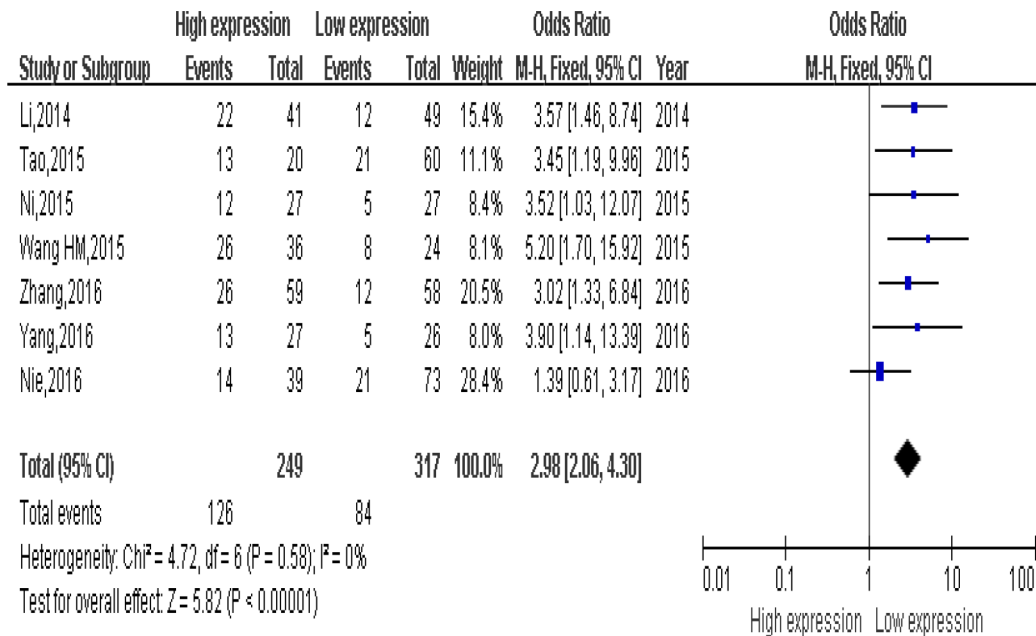

**Supplementary Figure S10: The correlation between lncRNA-UCA1 expression and lymph node metastasis (yes vs. no).**

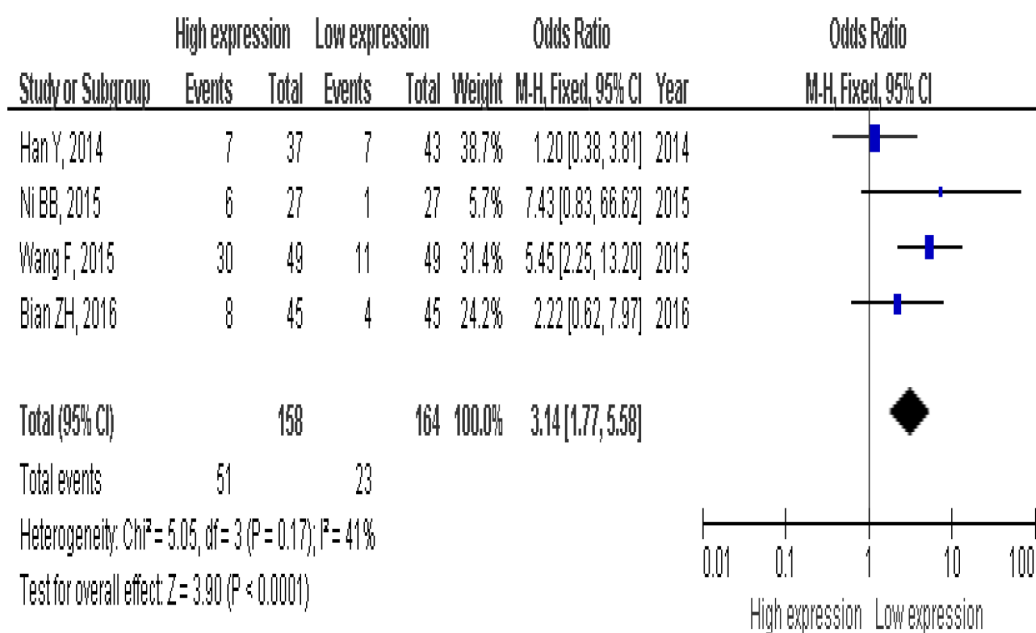

**Supplementary Figure S11: The correlation between lncRNA-UCA1 expression and distant metastasis (yes vs. no).**

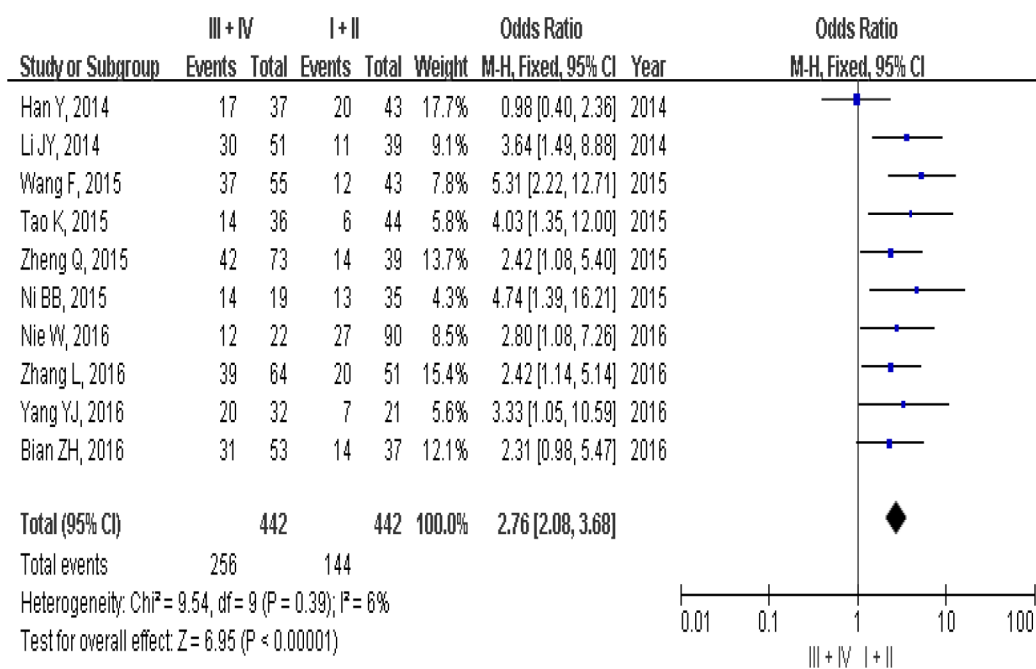

**Supplementary Figure S12: The correlation between lncRNA-UCA1 expression and TNM stage (III-IV vs. I-II).**
